# Supplementary material
Source: Springer Nature journal article supplement (https://www.springermedizin.de/resource/supplementary/13058_2008_2173_MOESM5_ESM.pdf/9700810)

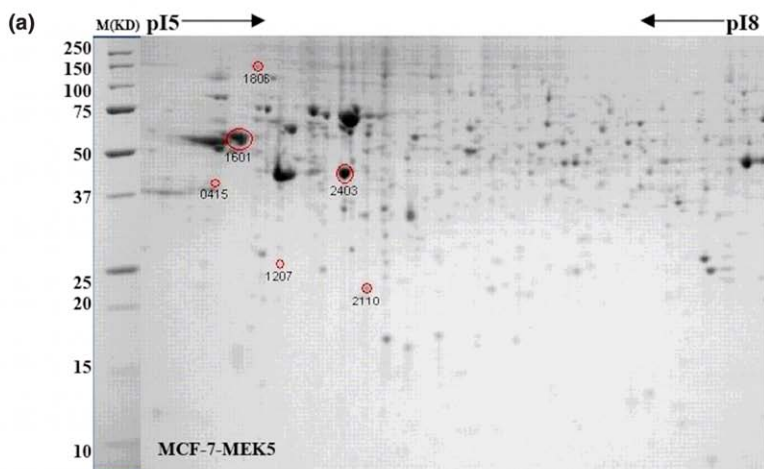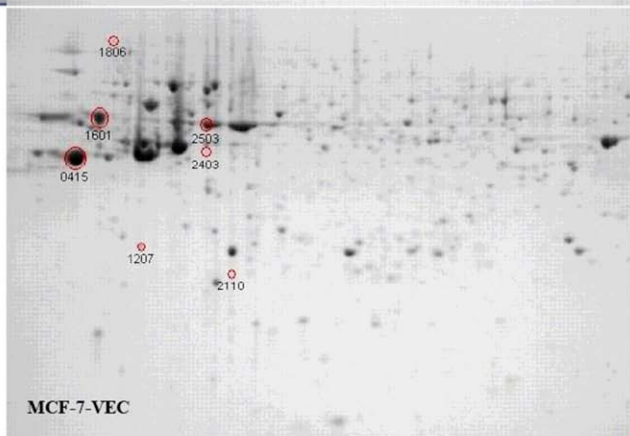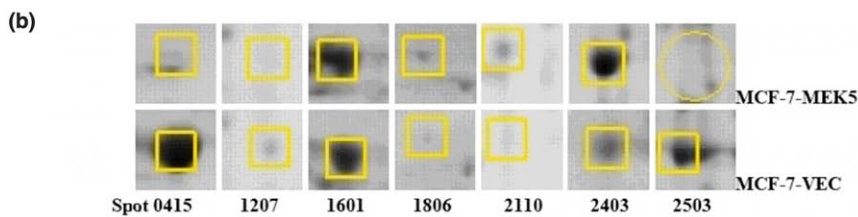

Supplement: MOESM5 [file 9700810]
